## Dengue prevention community engagement

1           Community engagement through “student-led science” for dengue  
2           prevention during the COVID-19 pandemic in Córdoba, Argentina.

3

4    Elizabet L. Estallo <sup>a</sup>, Magali Madelon <sup>b</sup>, Elisabet M. Benitez <sup>a,\*</sup>, Anna M. Stewart-Ibarra  
5    <sup>c</sup>, Francisco F. Ludueña-Almeida <sup>a,d</sup>

6

7    <sup>a</sup> Instituto de Investigaciones Biológicas y Tecnológicas (IIBYT) CONICET- Universidad  
8    Nacional de Córdoba. Centro de Investigaciones Entomológicas de Córdoba, Facultad de  
9    Ciencias Exactas, Físicas y Naturales, Universidad Nacional de Córdoba. Av. Vélez Sarsfield  
10   1611. Ciudad Universitaria, Córdoba Capital, Córdoba, Argentina. ZIP code:  
11   X5016GCA. Phone: +54+351+5353800.

12   <sup>b</sup> Instituto Jesús María. Hipólito Vieytes 1635, Córdoba, Argentina. ZIP code X5000.  
13   Phone: +54+351+465-0306.

14   <sup>c</sup> Inter-American Institute for Global Change Research. Av. Italia 6201 edificio Los  
15   Tilos, of. 102. Montevideo, Uruguay. ZIP code: 11500. Phone: +598 26060126.

16   <sup>d</sup> Cátedra de Matemática (Cs. Biológicas), Facultad de Ciencias Exactas, Físicas y Naturales,  
17   Universidad Nacional de Córdoba. Av. Vélez Sarsfield 1611. Ciudad Universitaria,  
18   Córdoba Capital, Córdoba, Argentina. ZIP code: X5016GCA.

19

20   \*Corresponding author:

21   Email: benitez.elisabet@gmail.com (EMB)

22

23

24

25

26

## Dengue prevention community engagement

### 27 Abstract

### 28 Background

29 During 2019-2020 while COVID-19 pandemic, the Americas were facing the biggest  
30 dengue fever epidemic in recent history. Traditional vector control programs, based on  
31 insecticide application have been insufficient to control the spread of dengue fever.  
32 Several studies suggest refocusing on education with the aim of an integrated vector  
33 management strategy within the local ecological-community context. We aim to assess  
34 community perceptions, knowledge, attitude, preventive practice, and action through  
35 student-led science assignments regarding dengue fever, prevention, and socio-  
36 ecological factors in temperate Córdoba, Argentina.

### 37 Methods

38 The study was conducted during the COVID-19 quarantine when schools switched to  
39 online education for the first time. Several activities through Google Classroom  
40 platform included a survey to one student's family member, and an outdoor activity to  
41 assess their attitudes and to clean the backyard and gardens.

### 42 Results

43 Significant number of respondents developed good preventive practices and increased  
44 their knowledge about the vector and disease highlighting that 75% of responders knew  
45 that dengue fever was transmitted by a mosquito, 81.96% declared having obtained  
46 knowledge regarding dengue and vector through television, 56% affirm that dengue is  
47 a severe illness, 67% of respondents admitted that individuals play an important role in  
48 the prevention of dengue. Regarding mosquito control activities, 90% of respondents  
49 reported turning containers.

## Dengue prevention community engagement

### 50 Conclusions

51 This highlights the need for school programs with curricula to address vector biology  
52 and the prevention of vector-borne diseases not only during activity periods when  
53 mosquitoes bother people but all year long to do real prevention.

54 **Key Words:** dengue prevention, vector-borne disease, community perception,  
55 quarantine, Argentina.

56

### 57 Introduction

58 Since 2020 the COVID-19 pandemic has affected countries around the world. Argentina  
59 has been in mandatory quarantine since March 20, 2020, being extended several times in  
60 the year [1] with online school and the emergence of online education and opportunities  
61 and challenges faced. At the same time, the Americas were also facing the biggest  
62 dengue fever (DEN) epidemic in history [2]. Dengue fever is caused by dengue virus  
63 (DENV), transmitted by *Aedes aegypti* mosquito to humans, with a wide geographic  
64 spread of the virus and its vector in tropical, subtropical, and even temperate areas [3, 4].  
65 During the season 2019-2020 Argentina has reported 58,889 DEN cases, with 3  
66 circulating serotypes in the country (1, 2, 4) and 26 deaths. This season exceeded by  
67 almost 40.5% accumulated cases in the 2015-2016 season, being the largest dengue  
68 outbreak that has been recorded in the history of the country so far [5]. It should be  
69 noted that the temperate central region of Argentina has been one of the most affected,  
70 with almost 40% of the cases reported. In Córdoba province, located in the temperate  
71 central area, 3,631 DEN cases were reported with two circulating serotypes (1 and 4) [3,  
72 5]. Unlike the 2019-2020 season, during the last season, 2020-2021 were reported 4,653  
73 DEN cases (serotypes 1, 2, 4) in all the country [6]. Several challenges must be sorted  
74 by the local health system, such as the focal control, because of the preventive isolation,

## Dengue prevention community engagement

75 as well as the difficulty of the clinic diagnostic by the physicians due to similar febrile  
76 symptoms (Federico Layun, from Cordoba municipality epidemiological system,  
77 personal communication).

78 Rapid human development, changes in demographics, population, rural-urban  
79 migration, inadequate basic urban infrastructure, an increase of solid waste, such as  
80 discarded plastic containers and other abandoned items such as cars wheels, plastic  
81 bags, unused objects that can provide larval mosquito habitats, and become a risk factor  
82 when DENV is circulating. These risk factors combined with appropriate environmental  
83 conditions enhance the likelihood of viral transmission [7, 8].

84 Traditional vector programs, based on chemical intervention, are not enough [9],  
85 therefore several studies suggest focusing on education with aim of an integrated  
86 management strategy (IMS) within the ecological-community context. In temperate  
87 areas like Cordoba, education is focused just during the high vector activity and not all  
88 year long as could be observed in some tropical countries. The IMS seeks to modify the  
89 behavior of individuals and the community in such a way as to reduce risk factors for  
90 transmission with coordinated measures both within and outside the health sector [10].

91 Indeed, there is evidence that education can lead to behavior changes related to DEN,  
92 revealing that knowledge scores were significantly increased after health education  
93 programs, barring a language communication gap [11, 12]. Prior studies have involved  
94 student's community and their families, focusing on dengue prevention, health  
95 promotion, and action, as in Honduras, where educational interventions were applied as  
96 part of a comprehensive plan for the control of *Ae. aegypti*, allowing the teachers and  
97 families in the program, inducing their participation in reducing sources at home [13].  
98 In Mexico through the implementation of an educational strategy, knowledge, attitudes,  
99 and practices about self-care in their schools engaged students as dengue promoters'

## Dengue prevention community engagement

100 changers in their homes [14]. The effectiveness of educational interventions was also  
101 evaluated in Colombia, where a high percentage of the participants change behavior  
102 related to vector breeding places, washing, and covering water storage tanks, containers,  
103 as well as collecting unusable potential breeding places in their homes [15]. In  
104 Argentina, research in Buenos Aires conducted surveys, interviews, home search for  
105 immature mosquitoes, placement of ovitraps (manufactured by students), workshop  
106 series, and illustrative classes with teachers and students involving their families and  
107 neighbors [16].

108 Community engagement, through “student-led science”, is a novelty in the area, and  
109 could fill the gap on getting to the households, leading to a change in attitudes in the  
110 home due to students becoming good household health educators. This study aims to  
111 assess household perceptions, knowledge, attitude, preventive practice, and action  
112 through student assignments regarding dengue fever, prevention, and socio-ecological  
113 factors during the concurrent dengue and COVID-19 pandemic in the city of Cordoba,  
114 Argentina, a temperate region where dengue has emerged over the last decade.

115

## 116 Methodology

### 117 Study area

118 The city of Córdoba is in the central area of Argentina with the Suquía River crossing it  
119 from northwest to east (Fig.1). It has an area of 576 km<sup>2</sup> with a population of 1.3  
120 million people, being the second-largest city in the country, following Buenos Aires.  
121 Córdoba is in a temperate region that experiences dry winters, annual rainfall of 800  
122 mm, and an average annual temperature of 18 °C(maximum of 27 °C and minimum of  
123 11 °C) [17].

124

## Dengue prevention community engagement

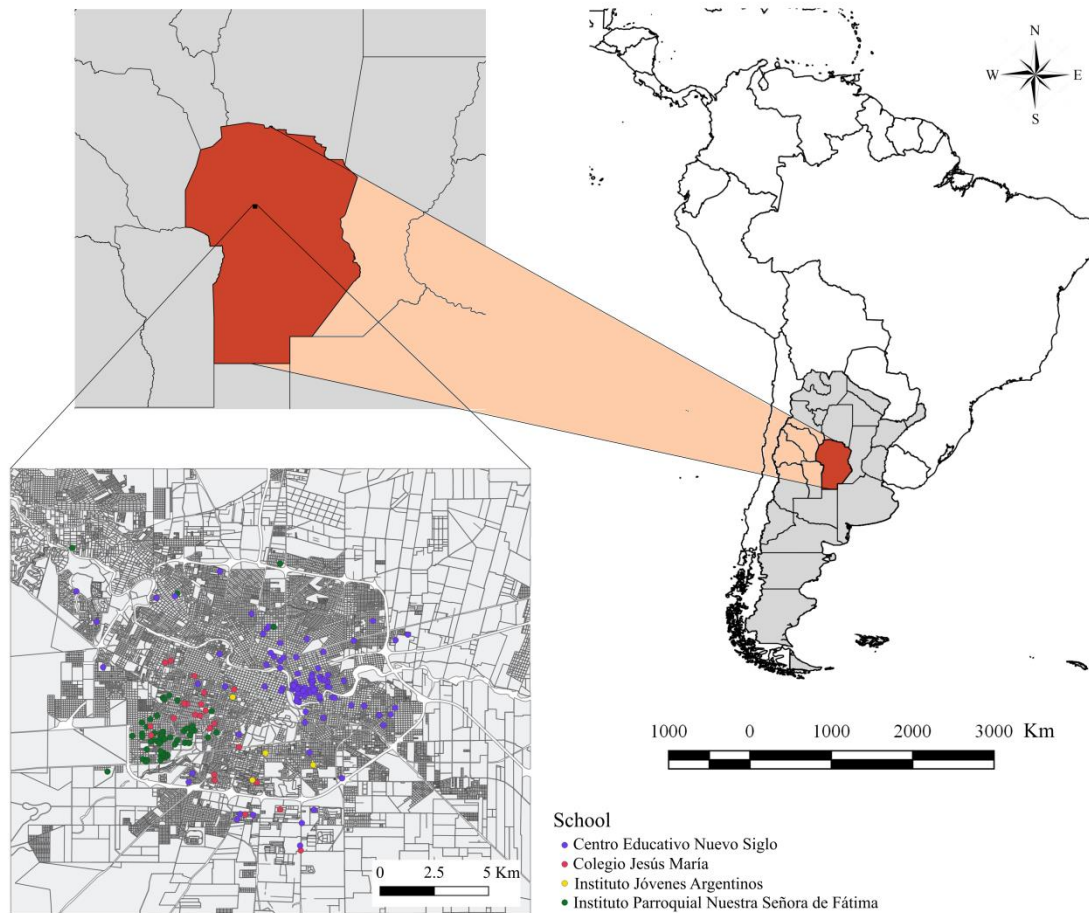

125

126 **Fig. 1.** Study area. Location of the Córdoba city (Argentina) where the surveys were  
127 conducted during 2020. The points show the approximate location of the respondents  
128 and the colors indicate the school to belong the students who conducted the surveys.

129

130 Dengue fever emerged in Córdoba over the last decade, with the first dengue outbreak  
131 occurring in 2009 [18]. The emergence of dengue has raised concern due to the rising  
132 public health burden [3, 19]. Vector control is conducted by the National Health  
133 Minister and consists mostly of focal control around homes with dengue cases, including  
134 indoor and outdoor fumigation, larviciding with *Bacillus thuringiensis israelensis* (BTI),  
135 and eliminating standing water [20]. In general terms, there have been public education  
136 campaigns to prevent dengue transmission; however, in some cases, campaigns have

## Dengue prevention community engagement

137 resulted in greater confusion by naming the mosquito as the disease and not  
138 differentiating between the virus and vector. In 2014 the government of Cordoba issued  
139 a strategic plan called “Plan estratégico de abordaje integral para la prevención y el  
140 control del dengue y de la chikungunya en Córdoba” (Strategic plan for integral  
141 management for the prevention and control of dengue and chikungunya in Córdoba)  
142 [21] that included in the need to strengthen education on dengue and chikungunya in the  
143 elementary, middle and high schools, as well as universities and teacher career training  
144 (in objective 5 section 6.5.2). Today there are no formal education programs that involve  
145 the students and the community and aim to cause a behavioral change to reduce disease  
146 risk. Some high schools with specialized Natural Science educational orientations do  
147 include in the 4th year of high school (students around 15 years old) some information  
148 about the transmission and prevention of relevant diseases in the country, like chagas,  
149 hemorrhagic fever, dengue, among others. In February 2020 the provincial government  
150 through the memorandum 02/2020 [22] informed school principals of the need for  
151 activities related to the dengue epidemic ongoing in the province, where they mention  
152 the school as the place to do prevention against dengue and advise to use pedagogical  
153 materials that were made available by the education minister of the Cordoba province  
154 government.

## 155 Ethics

156 This study was approved by the ethical committee from National University of  
157 Córdoba, Hospital Nacional de Clínicas (Clínicas National Hospital), General  
158 coordinator Dra. Susana del Carmen Vanoni. This study was an educational intervention  
159 implemented in schools and developed with teachers as part of the curriculum with  
160 informed consent signed by each of the school’s principals involved in this research;  
161 Lic. Natalia Magalí Carbo (Centro Educativo Nuevo Siglo), Lic. María Inés Buffa

## Dengue prevention community engagement

162 (Instituto Jóvenes Argentinos), Prof. Lic. Carlos E. Carranza (Instituto Parroquial  
163 Nuestra Señora de Fátima) and Elsa Ferrer (Instituto Jesús María). The study complies  
164 with all regulations and confirmation that informed consent was obtained from the  
165 participants.

### 166 Field data collection

167 Because of the mandatory quarantine during the COVID-19 pandemic, the program for  
168 developing community engagement by the schools through “student-led science” had  
169 three main activities that were labeled as “Dale Block al Dengue” (Spanish) that in  
170 English loosely translates to “Let’s Block Dengue,” playing with the social media  
171 meaning of blocking a person when you don’t like what they post and translating this  
172 to the role of mosquito as dengue vector, knowing that we can block dengue circulation  
173 if we eliminate the breeding places for mosquitos to develop. The student science,  
174 therefore, consisted of:

175 1-Survey about perceptions and knowledge regarding dengue fever, prevention, and  
176 socio-ecological factors; 2-Activity in their backyards to assess attitude; 3-The activity  
177 involving the action of cleaning backyard and gardens to remove unused artificial  
178 containers that were potential mosquito habitat. The three activities were developed  
179 using the Google Classroom platform. These activities were developed in cooperation  
180 and coordination between researchers and high school teachers to assess student science  
181 engagement. We worked with four private schools in the city (Fig. 1). One of the school  
182 principals decided to involve all classes, therefore every student had to be involved and  
183 do the activity as part of the school cooperation and engagement. Each of the other three  
184 schools involved only one class related to ecology, environment, and social development  
185 science for the natural science orientation high schools. This methodology was



## Dengue prevention community engagement

186 developed considering the ongoing dengue outbreak situation in the city and the  
187 concomitant mandatory quarantine faced in the country.

### 188 **The survey**

189 The survey was generated by Google Forms and put inside the Google Classroom  
190 platform to be implemented by the students of the four different private high schools  
191 involved in the program. According to the protocol established, each student surveyed a  
192 family member >18 years of age, living together in the same home, and one person was  
193 surveyed per household. The instructions included not to look in a book or the internet  
194 for the answers as it is important to know what is really known about the subject by the  
195 respondents. Based on prior field experience in the city and years of collaboration with  
196 the province of Córdoba Ministry of the Health (MOH) on the dengue program [23], we  
197 determined which variables to include in the survey for community engagement  
198 (Additional file 1). **Socio-ecological factors** covered the socio-demographic  
199 characteristics consisting of age, highest education degree, relationship with the student  
200 doing the survey, self-reported prior dengue infections in household members or  
201 knowledge of any person with the infection, people living in the household, travel  
202 history to neighboring countries or any other with the vector-borne transmission.

203 Questions focused on **Vector-borne diseases knowledge** included whether they were  
204 aware of dengue, symptoms, and *Ae. aegypti* vector knowledge. We also asked questions  
205 regarding their **perception of dengue risk**, the perception of prevention responsibility,  
206 and how they carry out the **household control activities**. We asked questions about the  
207 **environment surrounding the household** to have better information about proximity to  
208 potential vector breeding places within 500 meters from the surveyed homes. These  
209 include garbage dumps, depots, water channels, and the Suquía River [8], also we asked  
210 people where they have seen mosquitoes in their homes. A radius of 500 meters was

## Dengue prevention community engagement

211 selected because several studies have shown that females *Ae. aegypti* mosquitoes  
212 generally fly 100-500m [24, 25]. Any man-made discarded container in that range, such  
213 as abandoned items in urban public areas, could be a potential breeding place for the  
214 vector. For each category of the survey, we generated hypotheses to test (Table 1).

215

216 **Table 1 The hypothesis to test the different survey sections developed during the student-**  
217 **let-science study**

| Survey section                                                          | Hypothesis to test                                                                                                                                                                                                                                                                                                                                                                                              |
|-------------------------------------------------------------------------|-----------------------------------------------------------------------------------------------------------------------------------------------------------------------------------------------------------------------------------------------------------------------------------------------------------------------------------------------------------------------------------------------------------------|
| Socio-ecological factor                                                 | <ul style="list-style-type: none"><li>- Large percentage of surveyed know of dengue cases in their neighborhoods.</li><li>- Most trips to risk areas are made in summer vacations.</li></ul>                                                                                                                                                                                                                    |
| Vector-borne diseases knowledge                                         | <ul style="list-style-type: none"><li>-In the population, the correct knowledge of the symptoms of dengue disease depends on the educational level reached by each person.</li><li>- The source of information about <i>Ae. aegypti</i> and the diseases it transmits are electronic means rather than formal educational ones.</li></ul>                                                                       |
| Perception of dengue, household vector prevention and control practices | <ul style="list-style-type: none"><li>- Dengue is perceived as a moderate risk disease.</li><li>- Dengue prevention is a simple task and carrying it out depends on each individual.</li><li>- The activities related to eliminating containers that are potential breeding sites are the most frequent practices</li><li>-The use of repellents is not frequent to avoid the presence of mosquitoes.</li></ul> |

## Dengue prevention community engagement

|                                     |                                                                                                                                                                                              |
|-------------------------------------|----------------------------------------------------------------------------------------------------------------------------------------------------------------------------------------------|
| Household environmental surrounding | -knowing the conditions of the surrounding environment could help with prevention attitudes.<br><br>-knowing proximity to abandoned areas or rivers could lead to taking preventive actions. |
|-------------------------------------|----------------------------------------------------------------------------------------------------------------------------------------------------------------------------------------------|

218

### 219 **Attitude Activity**

220 The second activity involved the students' attitude of exploring their backyards, gardens  
221 and inside their homes to search for containers that hold water and could be potential  
222 mosquitoes breeding places. The students received training through lectures and a  
223 mosquitoes workshop showing them eggs, larval, pupa, and adult conversed stages to  
224 observe in the class. All this training was done during 2019, with the same schools and  
225 teachers involved in a citizen science project with our research group. Although,  
226 students were trained and taught again online during quarantine about mosquito *Ae.*  
227 *aegypti* life cycle and potential breeding places (Additional file 2). Each one of the  
228 students took photographs of their backyards/gardens showing if there were or were not  
229 potential mosquito breeding sites. Also, they take photographs of each one of the  
230 containers with or without water as well as the mosquito's stages inside of the water  
231 containers. We assess their attitude with the activity done and the photographs sent to  
232 the teacher class involved.

### 233 **Getting in the action**

234 The last activity involved having the students remove found containers with water that  
235 held any arthropod or could be a potential place for mosquitoes to lay eggs becoming a  
236 breeding place around their homes. This activity was done once for the school activity  
237 requirement, following the survey done before. The students send photographs of each

## Dengue prevention community engagement

238 found container, as well as the number of containers in their homes, discriminating  
239 between containers with water and without water.

### 240 Analysis

241 We analyzed each section of the survey using descriptive statistics to show the  
242 percentage of responses according to each section above described and we tested several  
243 hypotheses for each group of survey sections (Table1).

244 Survey responses were coded and grouped as variables: Adequate responses about  
245 symptoms (ARS), Adequate responses about dengue and vector knowledge (ARK), and  
246 Educational level (EL). For Adequate responses about symptoms (ARS) in relation to  
247 Educational level (EL), the ARS was worth 1 point when the respondent answered  
248 correctly and 0 points in another case. We tested for the association between ARS and  
249 the EL of the respondent using logistic regression analysis. For adequate responses  
250 about dengue and vector knowledge (ARK), analyzing the question about how dengue is  
251 spread, a score was applied to the answers obtained, attributing a score of 2 points to the  
252 answers that included as a response: "through a mosquito bite", or the response "that  
253 mosquito should be previously infected", and a score of 5 was assigned to the  
254 respondents who answered included the scientific name of the mosquito that transmits  
255 dengue, and a value of 10 points when they clarified that "it is the female that bites".

256 In the same way, a differentiated score was also applied according to the response  
257 obtained from the respondents about what *Ae. aegypti* is. We gave a 2 point score to  
258 those answers that only mentioned that it was a mosquito or a vector, or that it  
259 transmitted Dengue. We gave a 4-point score when they mentioned that *Ae. aegypti* is  
260 the scientific name of the mosquito, which transmitted other diseases in addition to  
261 Dengue, or specified the physical characteristics of the species.

262 Finally, a sum of the obtained scores was made, and those respondents who had

## Dengue prevention community engagement

263 obtained between 10 and 28 points were considered as answers with sufficient  
264 knowledge. And those who had obtained less than 10 points as answers with insufficient  
265 knowledge. These results were analyzed according to the age of the respondent and the  
266 educational level reported.

267 Preventive practices refer to the interviewee's self-reported actions to avoid breeding  
268 mosquitoes and mosquito bites in their dwellings. Among actions declared were mowing  
269 the grass, the use of mosquito's coils as repellents and spirals, fumigation, physical  
270 elimination of habitats to reduce breeding sites, and chemical products applied in  
271 swimming pools. According to the expert consensus regarding *Ae. aegypti* control [26],  
272 not all the mentioned actions have the same weight. Therefore, we calculated a weighted  
273 score of control actions:  $V = 10R + 5B + 5P + 2F + S$

274 Where  $V$  is the total points assigned to the surveyor according to the declared actions,  
275 represented with letters ( $R, B, P, F, S$ ) receiving 1 point if the action was declared in the  
276 answer as done, or 0 points if the action wasn't declared.

277 The  $R$  indicated the action against containers (physical elimination of habitats, cover  
278 containers, put down artificial containers to reduce breeding sites) which was scored  
279 with 10 points because is the most action to reduce *Ae. aegypti* population.  $B$  indicated  
280 bite protection against mosquitoes through the use of insecticides like repellents and  
281 spirals, and this action was valued with 5 points.  $P$  corresponds to applied chemicals in  
282 swimming pools that were valued with 5 points.  $F$  refers to fumigation or spraying the  
283 dwelling and peri-dwelling with insecticides, which was valued with 2 points. Even  
284 though with this practice it is possible to eliminate mosquitoes, other insects are  
285 affected as well as human health and pets.  $S$  is assigned to grass mowing, which gets 1  
286 point because the only impact is a reduction of a possible refuge for male or female  
287 mosquitoes.

## Dengue prevention community engagement

288 Therefore, the  $V$  value could be from 0 to 23, and the actions were qualified as sufficient  
289 if they scored equal to or greater than 12 points, and insufficient if less than 12  
290 preventive practices were associated with age and education level through logistic  
291 regression analysis. All statistical analyses were conducted in Infostat software [27].  
292

## 293 Results

294 A total of 240 students conducted the surveys, but only 188 accomplish the condition of  
295 surveying one family member >18 years of age, living together in the same home.  
296 Therefore 188 surveyors were considered in this study, and 52 participants were  
297 excluded because either they did not live together in the same home or they were not  
298 >18 years of age, with a remaining 188 study participants included in the analysis.

### 299 Socio-ecological factors

300 Table 2 provides a summary of socio-ecological factors including socio-demographic  
301 characteristics of the participants. Most participants were 30 years of age or older  
302 (88.2%). Most homes had 4 inhabitants. Although the study was conducted amidst the  
303 biggest dengue outbreak in history, more than 90% were unaware of dengue cases in  
304 their neighborhoods. Most of the responders had completed high school. Among the  
305 people that travel outside the country, most traveled during the months of January and  
306 February, the southern hemisphere summer vacation period, to neighboring countries  
307 (Table 2).

**Table 2 Information provided by respondents on socio-ecological factors**

| Variable                               | Number | Percentage (%) |
|----------------------------------------|--------|----------------|
| <i>Age</i>                             |        |                |
| 18-29                                  | 21     | 11.2           |
| ≥30                                    | 167    | 88.9           |
| <i>Number of inhabitants for house</i> |        |                |
| 1                                      | 1      | 1.0            |
| 2                                      | 19     | 9.8            |

## Dengue prevention community engagement

|                                                                         |     |      |
|-------------------------------------------------------------------------|-----|------|
| 3                                                                       | 32  | 16.5 |
| 4                                                                       | 86  | 46.4 |
| 5                                                                       | 35  | 18.6 |
| ≥ 6                                                                     | 15  | 7.7  |
| <i>Respondents with knowledge of dengue cases in their neighborhood</i> |     |      |
| Yes                                                                     | 17  | 9.0  |
| No                                                                      | 171 | 91.0 |
| <i>Education level</i>                                                  |     |      |
| Primary                                                                 | 4   | 2.1  |
| Secondary                                                               | 62  | 33.0 |
| Tertiary                                                                | 41  | 21.8 |
| Graduate                                                                | 71  | 37.8 |
| Postgraduate                                                            | 8   | 4.3  |
| Doesn't answer                                                          | 2   | 1.1  |
| <i>Recent travel destinations</i>                                       |     |      |
| Don't travel                                                            | 150 | 79.8 |
| Brazil                                                                  | 25  | 13.3 |
| Caribbean/ Middle América                                               | 4   | 2.1  |
| Bolivia                                                                 | 1   | 0.5  |
| North of the country                                                    | 13  | 6.9  |
| <i>Year of trips to risk areas</i>                                      |     |      |
| 2020                                                                    | 39  | 43.8 |
| 2019                                                                    | 20  | 22.5 |
| 2018                                                                    | 14  | 15.7 |
| 2017                                                                    | 5   | 5.6  |
| <2016                                                                   | 11  | 12.4 |
| <i>Frequency of trips to risk areas</i>                                 |     |      |
| Annual                                                                  | 83  | 97.6 |
| Monthly                                                                 | 2   | 2.4  |
| <i>Months of trips to risk areas</i>                                    |     |      |
| January                                                                 | 51  | 27.1 |
| February                                                                | 30  | 16.0 |
| March                                                                   | 5   | 2.7  |
| April                                                                   | 2   | 1.1  |
| June                                                                    | 1   | 0.5  |
| July                                                                    | 5   | 2.7  |
| August                                                                  | 2   | 1.1  |
| September                                                               | 2   | 1.1  |
| October                                                                 | 2   | 1.1  |
| November                                                                | 3   | 1.6  |
| December                                                                | 21  | 11.2 |

308

### 309 **Vector-borne diseases knowledge**

310 Most of the responders (75%; 141/188) knew that dengue fever was transmitted by a

311 mosquito. For knowledge on dengue symptoms, fever, body ache, and shivering were

## Dengue prevention community engagement

312 the most frequently mentioned as dengue symptoms (Table 3). In general, the responders  
 313 showed knowledge about dengue as a disease, but few knew that the dengue virus has  
 314 the same name as the disease (Table 3). Furthermore, most were aware that dengue is  
 315 spread due to the mosquito bite (Table 3). Few knew that although the mosquito must be  
 316 infected to transmit the disease, not all mosquitoes are infected (Table 3). Not many  
 317 people specified that the *Aedes* mosquito is the mosquito involved in dengue virus  
 318 transmission. The sources of acquiring the knowledge were mainly the television and the  
 319 internet, highlighting the need for effective school programs to bring knowledge to the  
 320 community (Table 4 provides the responder's source of information about dengue and  
 321 *Ae. aegypti* mosquitoes). Respondents declared having obtained knowledge regarding  
 322 dengue and *Ae. aegypti* through television (159, 81.96%) internet (151, 77.84%) and  
 323 school (64,32.99%).

324

325 **Table 3 Information provided by respondents on vector-borne diseases knowledge**

| Question                     |          | Responses                      | Number of responses | %     |
|------------------------------|----------|--------------------------------|---------------------|-------|
| <i>What is dengue?</i>       |          |                                |                     |       |
| Correct                      |          | A disease                      | 167                 | 88.83 |
|                              |          | An infection                   | 4                   | 2.13  |
|                              |          | A virus                        | 7                   | 3.72  |
|                              |          | TOTAL                          | 178                 | 94.68 |
| Not correct                  |          | A mosquito                     | 9                   | 4.79  |
|                              |          | Doesn't know                   | 1                   | 0.53  |
|                              |          | TOTAL                          | 10                  | 5.32  |
| <i>How is dengue spread?</i> |          |                                |                     |       |
|                              | Adequate | Through the bite of a mosquito | 178                 | 94.64 |



## Dengue prevention community engagement

|                                                     |             |                                                                                       |     |       |
|-----------------------------------------------------|-------------|---------------------------------------------------------------------------------------|-----|-------|
|                                                     |             | The mosquito must have been infected with the virus                                   | 56  | 29.79 |
|                                                     |             | The mosquito must first become infected (noting that not all mosquitoes are infected) | 10  | 5.32  |
|                                                     |             | The mosquitoes involved in transmission correspond to <i>Aedes aegypti</i> .          | 28  | 14.43 |
|                                                     |             | Only the females who can transmit the virus                                           | 6   | 3.19  |
|                                                     | Not correct | Sexually transmitted                                                                  | 1   | 0.53  |
|                                                     |             | Blood transfusion                                                                     | 1   | 0.53  |
|                                                     |             | Doesn't know                                                                          | 1   | 0.53  |
| <i>Do you know what Aedes aegypti is?</i>           |             |                                                                                       |     |       |
|                                                     | Adequate    | A mosquito                                                                            | 137 | 72.68 |
|                                                     |             | Transmitter of Dengue                                                                 | 103 | 54.79 |
|                                                     |             | A transmitter of dengue and other diseases                                            | 14  | 7.45  |
|                                                     |             | The species of the mosquito                                                           | 16  | 8.51  |
|                                                     |             | The scientific name                                                                   | 18  | 9.57  |
|                                                     |             | Mention of some category in the style of taxonomy                                     | 37  | 19.70 |
|                                                     | Not correct | Only "yes"                                                                            | 13  | 6.91  |
|                                                     |             | Doesn't know                                                                          | 12  | 6.38  |
|                                                     |             | The scientific name of the disease                                                    | 3   | 1.6   |
|                                                     |             | Dengue in its scientific term                                                         | 1   | 0.53  |
|                                                     |             | The infected mosquito called dengue                                                   | 1   | 0.53  |
|                                                     |             | The virus                                                                             | 1   | 0.53  |
| <i>Are all the biting mosquitoes Aedes aegypti?</i> |             |                                                                                       |     |       |

## Dengue prevention community engagement

|       |             |                          |     |       |
|-------|-------------|--------------------------|-----|-------|
|       | Adequate    | No                       | 169 | 89.89 |
|       |             | The common mosquito too  | 1   | 0.53  |
|       | Not correct | Only females             | 2   | 1.06  |
|       |             | Yes                      | 1   | 0.53  |
|       |             | Only infected mosquitoes | 4   | 2.13  |
|       |             | Doesn't know             | 9   | 4.79  |
| TOTAL |             | 188                      |     |       |

326

327

328 **Table 4 Information provided by respondents on How do they know about dengue and**  
 329 ***Aedes aegypti***

|   | TV    | INTERNET | SCHOOL | OTHER | n  | %     |
|---|-------|----------|--------|-------|----|-------|
|   | *     |          |        |       | 19 | 10.11 |
|   |       | *        |        |       | 20 | 10.64 |
|   |       |          | *      |       | 4  | 2.13  |
|   | *     | *        | *      |       | 26 | 13.83 |
|   | *     | *        |        |       | 15 | 7.98  |
|   |       | *        | *      |       | 22 | 11.70 |
|   | *     |          |        | *     | 54 | 28.72 |
|   |       | *        |        | *     | 5  | 2.66  |
|   |       |          | *      | *     | 4  | 2.13  |
| n | 153   | 118      | 64     | 56    |    |       |
| % | 81.38 | 62.77    | 34.04  | 29.79 | 0  | 0     |

330

331

### 332 Perception of dengue risk

333 Regarding perceptions of dengue, the majority (56%) affirm that dengue is a severe  
 334 illness and 21% a moderate one. When people were asked how feasible they think it is to  
 335 prevent dengue, most (59%) answered that it is easy while 38% said that it is relatively  
 336 difficult. Two-thirds (67%) of respondents admitted that individuals play an important

## Dengue prevention community engagement

337 role in the prevention of dengue.

### 338 **Household control activities**

339 Regarding mosquito control activities, 90% of respondents reported turning containers  
340 with water upside down and/ or eliminating them, 64% mow the grass, and 33% add  
341 chemicals to the pool. In addition, 92% claimed to use repellents or spirals to avoid  
342 mosquitoes, while 19% fumigate their homes. Regarding physical barriers, the majority  
343 (76%) acknowledged that they do not have window screens and 91% do not have door  
344 screens to prevent the entry of mosquitoes into their homes.

345 In addition to the aforementioned preventive measures, the respondents also reported  
346 organizing and cleaning the house and yard, disinfecting, and using insecticides. People  
347 also reported cleaning containers that contain water such as water bowls for pets, vases  
348 with aquatic plants, cleaning gutters, and checking that drains and garbage bags do not  
349 accumulate water.

### 350 **The environment surrounding the household**

351 Regarding the environment surrounding households, abandoned urban land is often used  
352 to discard solid waste in urban neighborhoods. One-third (36%) of the surveyed  
353 households reported an informal dumping area near their dwelling. An additional 15%  
354 of the respondents had a formal garbage dump near their dwelling. We considered water  
355 channels and Suquia River as risk places because people throw trash along the shores,  
356 generating mosquito breeding sites; one-third (31%) of the respondents lived near water  
357 channels, and 21% lived near the Suquia River. Most people reported observing  
358 mosquitoes both inside and outside of the home (59%); however, some reported  
359 mosquitoes mostly outside their houses in the garden, backyard, or even open galleries  
360 (21%); and others (20%) reported mosquitoes only inside their dwelling. The majority  
361 (88%) reported seeing mosquitoes every day during the warm season in 2020, during

## Dengue prevention community engagement

362 the epidemic.

### 363 **Logistic regression analysis**

364 In relation to knowledge about dengue, the majority (94.68%) responded corrected that

365 dengue was either a disease (88.83%), an infection (2.13%) or a virus (3.72 %)

366 Regarding how dengue is spread, 183 (94.33%) respondents indicated that it occurs

367 through the bite of a mosquito. One-third (30.41%) indicated that the mosquito must

368 have been previously infected with the virus, and 12 respondents (6.19%) pointed out

369 that the mosquito must first become infected, noting that not all mosquitoes are infected.

370 28 (14.43%) respondents noted that the mosquitoes involved in transmission correspond

371 to *Ae. aegypti*. Few people (3.19%) mentioned that it is only the female mosquitoes who

372 can transmit the virus. When questioned whether the respondent knows what *Aedes*

373 *aegypti* is, most (72.68%) answered correctly that it was a mosquito, and most (54.12%)

374 mentioned that it was a transmitter of dengue. Several people (n=14) indicated that it

375 also transmitted other diseases and others reported (n=16) that it was the species of the

376 mosquito, or the scientific name (n=19). Most of the respondents knew that all the

377 biting mosquitoes are not *Aedes aegypti*, (90.20%). A single respondent mentioned the

378 existence of another mosquito, "the common mosquito", which would correspond to

379 *Culex quinquefasciatus*, which is very common in Córdoba.

380 Respondents correctly identified dengue symptoms such as fever, muscle pain,

381 headache, etc. (Table 5). Taking into account the WHO characterization of symptoms,

382 the variable ARS (Adequate answers about symptoms) was generated that is worth 1

383 when the respondent answered correctly and zero in another case. Based on the

384 formulated hypothesis we expected to find that the correct knowledge of the symptoms

385 of dengue disease depends on the educational level reached by each person. The

386 association between ARS (Adequate responses about symptoms) and the EL

## Dengue prevention community engagement

387 (Educational level) of the responders (Table 6) showed that was partially correct.  
 388 Although it was shown that at the graduate level there is a notable tendency to correctly  
 389 indicate dengue symptoms, even more than expected ( $\chi^2= 21.63$ ,  $p<0.001$ ), there is no  
 390 significative differences between the percentage of people that answer correctly and  
 391 those who do not in the rest of the levels (Table 6).

392

393 **Table 5 Knowledge about *Aedes aegypti*, dengue, and the main symptoms**

| Knowledge about <i>Aedes aegypti</i> , dengue, and the main symptoms |        |          |              |                |                     |
|----------------------------------------------------------------------|--------|----------|--------------|----------------|---------------------|
|                                                                      | Enough | % Enough | Insufficient | % Insufficient | Number of responses |
| <i>Age group</i>                                                     |        |          |              |                |                     |
| Under 30 years                                                       | 8      | 36%      | 14           | 64%            | 22                  |
| Over 30 years old                                                    | 66     | 40%      | 99           | 60%            | 165                 |
|                                                                      |        |          |              |                |                     |
|                                                                      | Enough | % Enough | Insufficient | % Insufficient | Number of responses |
| <i>Education level</i>                                               |        |          |              |                |                     |
| 1 (school)                                                           | 27     | 40%      | 40           | 60%            | 67                  |
| 2 (advanced)                                                         | 47     | 39%      | 73           | 61%            | 120                 |
|                                                                      | 74     |          | 113          |                | 187                 |

394

395

396 **Table 6 Association between ARS (Adequate responses about symptoms (1: adequate; 0:**  
 397 **not adequate) variables and the Educational level (EL) of the respondent**

| E L          | ARS | n  | %     | $\chi^2$ | p-value |
|--------------|-----|----|-------|----------|---------|
| Primary      | 0   | 2  | 1.15  | 0.53     | 0.4652  |
|              | 1   | 2  | 1.15  |          |         |
| Secondary    | 0   | 27 | 15.52 | 4.68     | 0.0306  |
|              | 1   | 27 | 15.52 |          |         |
| Tertiary     | 0   | 20 | 11.49 | 3.33     | 0.0679  |
|              | 1   | 20 | 11.49 |          |         |
| Graduate     | 0   | 1  | 0.57  | 21.63    | <0.0001 |
|              | 1   | 68 | 39.08 |          |         |
| Postgraduate | 0   | 2  | 1.15  | 0.00     | >0.9999 |
|              | 1   | 5  | 2.87  |          |         |

398 n: number of respondents in each category; %: observed percentage of respondents belonging to each  
 399 category;  $\chi^2$ : comparison of observed and expected frequencies in each category.

400

## Dengue prevention community engagement

401 When comparing knowledge about dengue and the vector (Table 7), and good  
402 preventive practices in relation to the educational level (EL) achieved and group age, the  
403 analysis indicated no significant differences. Regardless of this, we observed that a  
404 significant number of surveyors (84.5%) develop good preventive practices.

405

406 **Table 7 Knowledge about *Aedes aegypti*, dengue, and the main symptoms**

|                   |             | Enough |      | Insufficient |      | $\chi^2$ | p-value |
|-------------------|-------------|--------|------|--------------|------|----------|---------|
|                   |             | n      | %    | n            | %    |          |         |
| Age group         | 18–30 years | 8      | 36.4 | 14           | 63.6 | 0.11     | 0.7432  |
|                   | >30 years   | 66     | 40   | 99           | 60   |          |         |
| Educational level | Secondary   | 27     | 40.3 | 40           | 59.7 | 0.02     | 0.8794  |
|                   | Superior    | 47     | 39.2 | 73           | 60.8 |          |         |
| Total             |             | 74     | 39.6 | 113          | 60.4 | 4.12     | 0.0423  |

407 n: number of respondents in each category; %: observed percentage of respondents belonging to each  
408 category;  $\chi^2$ : comparison of observed and expected frequencies in each category.

409

### 410 **About the Attitude Activity**

411 With regards to the activity involving students' attitude of exploring their backyards  
412 and/or their gardens and even inside their homes, searching for containers that hold  
413 water and could be potential mosquitoes breeding places, only 94 students (39 %) completed the activity and documented the activity with photography that was sent to  
414 their teachers. The students were able to identify mosquito breeding sites such as pots,  
415 buckets, bottles, drinkers, jars, vases, among others (Fig. 2). 89% of the students found  
416 water inside the containers and of these, 17% found the presence of mosquito larvae,  
417 although it was impossible to know if they were *Ae. aegypti*.

419

## Dengue prevention community engagement

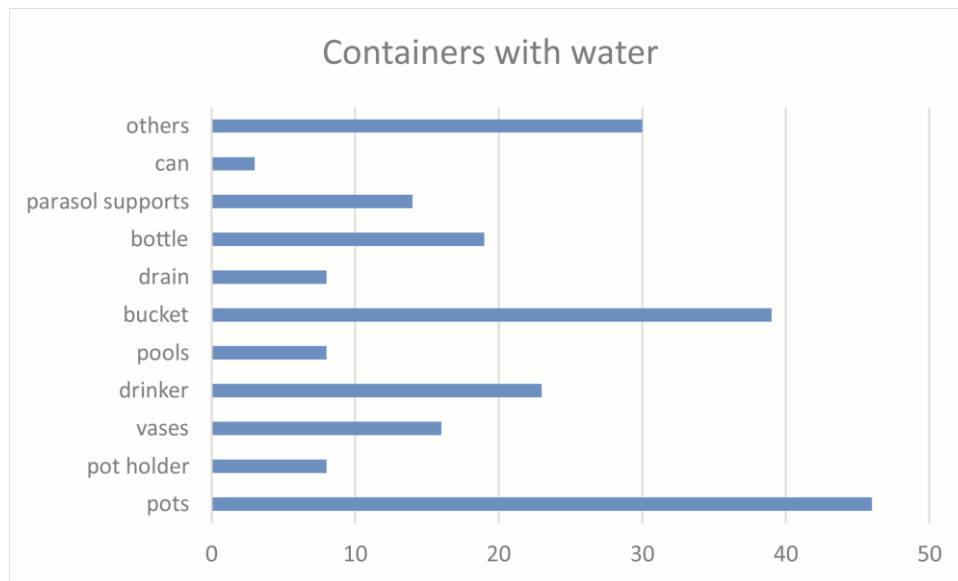

420

421 **Fig. 2.** Potential breeding sites. Number and type of containers with water found in the  
422 dwellings of the students who carried out the activity.

423

### 424 **About the Action**

425 Finally, students put into practice the knowledge acquired by eliminating containers as  
426 well as storing them indoors without water, documenting with photos that were sent to  
427 the teacher in each of the schools involved. 61 students (65%) gave their opinions about  
428 the whole activity describing a positive impact on their family environment and future  
429 decisions with respect to vector management.

430

### 431 **Discussion**

432 Considering that community awareness and education are critical factors for *Ae.*  
433 *aegypti* mosquito's management, we thought of this pilot online experience during the  
434 COVID-19 pandemic quarantine. Student-led science engaged the teachers and involved  
435 students during online classes and the biggest dengue outbreak in our region's history.  
436 As we already know, dengue prevention depends on effective vector management.  
437 According to the World Health Organization [28], sustained community involvement

## Dengue prevention community engagement

438 can improve vector management efforts substantially. Although, mosquito educational  
439 interventions by the government in temperate areas of Argentina are done just during  
440 adult vector activity months when adult mosquitoes bother the people (November to  
441 April mainly), they are not sustained all year long as could be in tropical areas where  
442 dengue risk is all the yearlong.

443 As expressed in the surveys, people seem to have good knowledge about the vector and  
444 the disease in Córdoba city. A striking case is that observed in Malaysia where despite  
445 being in constant contact with the disease, since the risk of outbreaks is frequent or  
446 continuous [29], research shows that there is insufficient knowledge about the cause of  
447 the disease and how it is transmitted, as well as about the activity of the vector and the  
448 breeding sites where it develops [30]. Our results revealed the knowledge of people  
449 about *Ae. aegypti* mosquito but the lack of knowledge about *Ae. aegypti* as a vector that  
450 could be infected with the dengue virus. The need for appropriate knowledge  
451 transference to the community focuses on females like those who bite the humans and  
452 transfer the virus if they are infected. In accordance with McNaughton et al. [31],  
453 controlling dengue fever relies heavily upon the actions of residents as well as  
454 community education and awareness of the risks, if people do not know the cause of the  
455 disease and how it is transmitted later; therefore, appropriate practices cannot be  
456 implemented to prevent it. The mosquito vector seems to be known better by television  
457 and less by the school, indicating that television is an essential source of knowledge, as  
458 other studies assert [30, 32]. This generates an impact on the audience. It makes us think  
459 of television as a critical factor in vector-borne corrected knowledge transmission,  
460 awareness and spreading information by internet.

461 In addition, these could be highlighting the need of schools to add in their programs as  
462 main contents about mosquito biology and vector-borne diseases to raise awareness of a



## Dengue prevention community engagement

463 right knowledge diffusion to families and hence the community aiming to prevent  
464 vector breeding sites as well as the disease in a sustainable time as suggested by WHO.  
465 In fact, in accordance with previous studies, which evidenced the role of education  
466 leading behavior changes and increasing community knowledge after vector-borne  
467 focus education [11, 12]. About dengue perception, in Córdoba, the surveyors recognize  
468 the illness's importance and severity. These findings highlight a considerable difference  
469 concerning other communities in other countries like Colombia, which think it is not an  
470 illness but just regular flu (mild flu) or common cold [33]. Likewise, in a study made in  
471 Malaysia, most survey respondents recognized the common symptoms or signs of the  
472 disease but not the complications they may manifest [30]. In tropical areas, people are  
473 used to the large number of dengue cases that occur each year because of being in an  
474 area where the presence of the vector and the virus circulation is constantly unlike  
475 temperate Córdoba city, with vector activity during the warmer months. For this reason,  
476 people could underestimate its importance.

477 Our study highlights people understanding of dengue prevention as a responsibility of  
478 each individual, including schools and government, unlike other studies in which most  
479 people place responsibility on the government and health care authorities besides each  
480 household [32]. In fact, in our study, people affirm that school has a fundamental role in  
481 raising awareness and educating. For its part, the government communicates, gives  
482 information, fumigates, and takes control of the vector situation. With this, phrases like  
483 "joint work" and "social responsibility" should be pointed out.

484 People movement is one of the main causes of disease expansion [34]; we reported that  
485 people with travel, most travel recently to neighboring countries like Brazil, that  
486 presents more than 2,226,900 dengue cases during 2019 with the highest impact in  
487 history [5]. This situation increases the risk of income imported cases to the country.

## Dengue prevention community engagement

488 Indeed, areas of southern Brazil reported co-circulation of dengue virus 1, 2, and 4 until  
489 epidemiological week 23 [35].

490 It is important to mention that all the prevention methods that people refer to are  
491 recommendations from the media highlighting their relevance to people's awareness.

492

## 493 Conclusion

494 Having good knowledge alone is not sufficient for dengue control while perception  
495 towards barriers, self-efficacy, and cues to act among respondents can be further  
496 strengthened. As dengue is related to health behavior, future prevention and control  
497 programs can be designed to encourage communities to make decisions and behavior  
498 changes for dengue and dengue prevention effectively. Through this study, we  
499 encourage the need of adding school programs to engage the community and transmit  
500 the constant implications of the mosquito-borne disease, and the need for vector  
501 mosquito management together as a community. We encourage the need for schools and  
502 government campaigns together, with the engagement of journalists and television as  
503 the means for people to get knowledge on mosquito *Ae. aegypti* and dengue diseases  
504 massively. We need to inculcate positive attitudes on the population and cultivate better  
505 preventive practices to eliminate the breeding places for mosquitoes' vectors and  
506 therefore diminished the possibility of dengue fever circulating in our city.

507

## 508 Supplementary information

509 **Additional file 1.** Survey instrument including questions regarding the identification of  
510 vector-borne diseases, socio-ecological factors, knowledge, and perception of dengue,

## Dengue prevention community engagement

511 household vector prevention and control actions, as well as the household  
512 environmental surrounding. (Additional file 1.docx)

513 **Additional file 2.** Additional details about training of students to learn about the vector  
514 and carry out the Attitude activity. (Additional file 2.docx)

515

## 516 Declarations

517 **Ethics approval and consent to participate:** Not applicable.

518 **Consent for publication:** Not applicable.

519 **Availability of data and materials:** Not Applicable

520 **Competing interests:**

521 The authors declare that they have no competing interests.

522 **Funding:**

523 This work is part of a project conducted under the Ministry of Science and Technic  
524 (MINCYT) from Córdoba Government grant for upcoming research groups GRFT  
525 2019/000298 and a project "Aplicaciones Matemáticas a la Biología" Consolidar 2018-  
526 2022, Code: 33620180100735CB, supported by Secretary of Science and Technology  
527 (SECyT-Universidad Nacional de Córdoba).

528 **Author Contributions:**

529 **Elizabet L. Estallo:** Conceptualization, Methodology, Investigation, Formal Analysis,

530 Writing - original draft, Writing - review & editing. **Magali Madelon:** Investigation,

531 Formal Analysis, Writing - original draft, Writing - review & editing. **Elisabet M.**

532 **Benitez:** Investigation, Formal Analysis, Writing - original draft, Writing - review &

533 editing. **Anna M. Stewart-Ibarra:** Writing - original draft, Writing - review & editing.

534 **Francisco F. Ludueña-Almeida:** Methodology, Investigation, Formal Analysis,

## Dengue prevention community engagement

535 Writing - original draft, Writing - review & editing.

### 536 **Acknowledgments**

537 The authors wish to acknowledge the authorities and teachers from four high school  
538 “Jóvenes Argentinos”, “Centro Educativo Nuevo Siglo”, “Instituto Nuestra Señora de  
539 Fatima” and “Instituto Jesús María” for their engagement and collaboration doing  
540 Citizen science through this study. This research was supported by the Science and  
541 Technology Ministry of Córdoba Province (MINCYT) grant GRFT 2019/000298 and  
542 the Secretary of Science and Technology (SECyT-UNC) grant 33620180100735CB.  
543 Also, we thank Daniela Tinunin and Agustina Ortiz for their help in survey  
544 development and part of the analysis. Daniela Tinunin developed her undergraduate  
545 thesis to develop as a biologist with the direction of Dra. Estallo and Dr. Ludueña-  
546 Almeida. Her collaboration is part of an internship carried out in the Centro de  
547 Investigaciones Entomológicas de Córdoba, Facultad de Ciencias Exactas, Físicas y Naturales,  
548 Universidad Nacional de Córdoba. ELE is a member of the Consejo Nacional de  
549 Investigaciones Científicas y Técnicas (CONICET) from Argentina and EMB is a PhD  
550 Student with scholarship support from CONICET.

551

## 552 **References**

- 553 [1] Boletín Oficial República Argentina. (2020). *Aislamiento social preventivo y*  
554 *obligatorio - Decreto 297/2020*. Retrieved 3 May, 2020, from  
555 <https://www.boletinoficial.gob.ar/detalleAviso/primera/227042>.
- 556 [2] Pan American Health Organization. (2020). *Actualización epidemiológica Dengue*.  
557 Retrieved 24 April, 2020, from

## Dengue prevention community engagement

- 558 [https://www.paho.org/hq/index.php?option=com\\_docman&view=download&cat](https://www.paho.org/hq/index.php?option=com_docman&view=download&cat)  
559 [egory\\_slug=dengue-2158&alias=51692-7-de-febrero-de-2020-dengue-](https://www.paho.org/hq/index.php?option=com_docman&view=download&category_slug=dengue-2158&alias=51692-7-de-febrero-de-2020-dengue-)  
560 [actualizacion-epidemiologica-1&Itemid=270&lang=es](https://www.paho.org/hq/index.php?option=com_docman&view=download&category_slug=dengue-2158&alias=51692-7-de-febrero-de-2020-dengue-actualizacion-epidemiologica-1&Itemid=270&lang=es).
- 561 [3] Robert, M. A., Stewart-Ibarra, A. M., & Estallo, E. L. (2020). Climate change and  
562 viral emergence: evidence from Aedes-borne arboviruses. *Current Opinion in*  
563 *Virology*, 40, 41-47. doi: 10.1016/j.coviro.2020.05.001.
- 564 [4] López, M. S., Jordán, D. I., Blatter, E., et al. (2021). Dengue emergence in the  
565 temperate Argentinian province of Santa Fe, 2009–2020. *Scientific Data*, 8, 134.  
566 <https://doi.org/10.1038/s41597-021-00914-x>.
- 567 [5] Ministerio de Salud de la Nación. (2020). *Boletín integrado de vigilancia N°507*.  
568 [https://www.argentina.gob.ar/sites/default/files/biv\\_492\\_se14\\_0.pdf](https://www.argentina.gob.ar/sites/default/files/biv_492_se14_0.pdf) Retrieved 28  
569 December, 2021, from [https://bancos.salud.gob.ar/recurso/boletin-integrado-de-](https://bancos.salud.gob.ar/recurso/boletin-integrado-de-vigilancia-n507-se31-28072020)  
570 [vigilancia-n507-se31-28072020](https://bancos.salud.gob.ar/recurso/boletin-integrado-de-vigilancia-n507-se31-28072020).
- 571 [6] Ministerio de Salud de la Nación. (2021). *Boletín integrado de vigilancia N°560*.  
572 Retrieved 28 December, 2021, from [https://bancos.salud.gob.ar/recurso/boletin-](https://bancos.salud.gob.ar/recurso/boletin-integrado-de-vigilancia-n560-se-302021)  
573 [integrado-de-vigilancia-n560-se-302021](https://bancos.salud.gob.ar/recurso/boletin-integrado-de-vigilancia-n560-se-302021).
- 574 [7] Ryan, S. J., Lippi, C. A., Nightingale, R., et al. (2019). Socio-ecological factors  
575 associated with dengue risk and *Aedes aegypti* presence in the Galápagos  
576 Islands, Ecuador. *International Journal of Environmental Research and Public*  
577 *Health*, 16(5), 682. <https://doi.org/10.3390/ijerph16050682>.
- 578 [8] Estallo, E. L., Sangermano, F., Grech, M., et al. (2018). Modelling the distribution  
579 of the vector *Aedes aegypti* in a central Argentine city. *Medical and Veterinary*  
580 *Entomology*, 32(4), 451–461. <https://doi.org/10.1111/mve.12323>.
- 581 [9] Mitchell-Foster, K., Beltran Ayala, E., Breilh, J., et al. (2015). Integrating  
582 participatory community mobilization processes to improve dengue prevention:

## Dengue prevention community engagement

- 583 an eco-bio-social scaling up of local success in Machala, Ecuador. *Transactions*  
584 *of the Royal Society of Tropical Medicine and Hygiene*, 109(2), 126–133.  
585 doi:10.1093/trstmh/tru209.
- 586 [10] San Martín, J. L., & Brathwaite Dick, O. (2007). La estrategia de gestión integrada  
587 para la prevención y el control del dengue en la región de las Américas. *Revista*  
588 *Panamericana de Salud Pública*, 21. doi: 10.1590/S1020-49892007000100011.
- 589 [11] Usman, H. B., Alsañafi, A., Abdulrashid, O., et al. (2018). Effect of health  
590 education on Dengue Fever: A comparison of knowledge, attitude, and practices  
591 in public and private high school children of Jeddah. *Cureus*, 10(12), e3809. doi  
592 10.7759/cureus.3809.
- 593 [12] Nasir Al-Zurfi, B. M., FuadFuad, M. D., Abdelqader, M. A., et al. (2015).  
594 Knowledge, attitude and practice of Dengue Fever and health education  
595 programme among students of Alam Shah Science School, Cheras, Malaysia.  
596 *Malaysian Journal of Public Health Medicine*, 15(2), 69-74.
- 597 [13] Ávila-Montes, G. A., Martínez, M., Sherman, C., & Fernández, C. E. (2004).  
598 Evaluación de un módulo escolar sobre dengue y *Aedes aegypti* dirigido a  
599 escolares en Honduras. *Revista Panamericana de Salud Pública*, 16(2), 84–94.
- 600 [14] Torres, J. L., Ordóñez, J. G., & Vázquez-Martínez, M. G. (2014). Conocimientos,  
601 actitudes y prácticas sobre el dengue en las escuelas primarias de Tapachula,  
602 Chiapas, México. *Revista Panamericana de Salud Pública*, 35(3), 214–8.
- 603 [15] Escudero-Támara, E., & Villarreal-Amaris, G. (2015). Intervención educativa para  
604 el control del dengue en entornos familiares en una comunidad de Colombia.  
605 *Revista Peruana de Medicina Experimental y Salud Pública*, 32, 19-25.  
606 doi:10.17843/rpmesp.2015.321.1570.
- 607 [16] Schweigmann, N., Rizzotti, A., Castiglia, G., et al. (2009). Información,

## Dengue prevention community engagement

- 608 conocimiento y percepción sobre el riesgo de contraer el dengue en Argentina:  
609 dos experiencias de intervención para generar estrategias locales de control.  
610 *Cadernos de Saúde Pública*, 25, 137-48. doi: 10.1590/S0102-  
611 311X2009001300013.
- 612 [17] Municipalidad de Córdoba. (2019). *Córdoba una ciudad en cifras 2019*. Retrieved  
613 24 April, 2020, from  
614 <https://gobiernoabierto.cordoba.gov.ar/media/datos/Guia2019-version-final.pdf>.
- 615 [18] Estallo, E. L., Carbajo, A. E., Grech, M. G., et al. (2014). Spatio-temporal  
616 dynamics of dengue 2009 outbreak in Córdoba city, Argentina. *Acta Tropica*,  
617 136, 129-136. <https://doi.org/10.1016/j.actatropica.2014.04.024>.
- 618 [19] Robert, M. A., Tinunin, D. T., Benitez, E. M., et al. (2019). Arbovirus emergence  
619 in temperate climates: the case of Córdoba, Argentina, 2009-2018. *Scientific*  
620 *Data*, 6, 276. <https://doi.org/10.1038/s41597-019-0295-z>.
- 621 [20] Ministerio de Salud de la Nación. (2009). *Plan nacional para la prevención y el*  
622 *control del dengue y la fiebre amarilla*. Retrieved from  
623 [https://www.msal.gov.ar/images/stories/cofesa/2009/acta-02-09/anexo-5-](https://www.msal.gov.ar/images/stories/cofesa/2009/acta-02-09/anexo-5-resumen-plan-dengue-02-09.pdf)  
624 [resumen-plan-dengue-02-09.pdf](https://www.msal.gov.ar/images/stories/cofesa/2009/acta-02-09/anexo-5-resumen-plan-dengue-02-09.pdf).
- 625 [21] Gobierno de la provincia de Córdoba. (2020). *Plan estratégico de abordaje*  
626 *integral para la prevención y el control del dengue y de la chikungunya en*  
627 *Córdoba*. Retrieved 13 January, 2022, from [https://www.cba.gov.ar/ministerio-](https://www.cba.gov.ar/ministerio-educacion-dengue/)  
628 [educacion-dengue/](https://www.cba.gov.ar/ministerio-educacion-dengue/).
- 629 [22] Secretaria de Educación, Gobierno de la provincia de Córdoba. (2020).  
630 *Memorandum N° 02/2020*. Retrieved 27 April, 2020, from  
631 [https://www.cba.gov.ar/wp-content/uploads/2020/03/Memo-2-20-Secretaria-de-](https://www.cba.gov.ar/wp-content/uploads/2020/03/Memo-2-20-Secretaria-de-Educaci%C3%B3n.pdf?csrt=1322809462130921235)  
632 [Educaci%C3%B3n.pdf?csrt=1322809462130921235](https://www.cba.gov.ar/wp-content/uploads/2020/03/Memo-2-20-Secretaria-de-Educaci%C3%B3n.pdf?csrt=1322809462130921235).

## Dengue prevention community engagement

- 633 [23] Estallo, E. L., Sippy, R., Stewart-Ibarra, A. M., et al. (2020). A decade of arbovirus  
634 emergence in the temperate southern cone of South America: dengue, *Aedes*  
635 *aegypti* and climate dynamics in Córdoba, Argentina. *Heliyon*, 6(9), e04858.  
636 <https://doi.org/10.1016/j.heliyon.2020.e04858>.
- 637 [24] McDonald, P. T. (1977). Population characteristics of domestic *Aedes*  
638 *aegypti* (Diptera: Culicidae) in villages on the Kenya coast. II. Dispersal within  
639 and between villages. *Journal of Medical Entomology*, 14, 49-53.
- 640 [25] Muir, L. E., & Kay, B. H. (1998). *Aedes aegypti* survival and dispersal estimated  
641 by mark-release-recapture in Northern Australia. *The American Journal of*  
642 *Tropical Medicine and Hygiene*, 58(3), 277–282. doi:  
643 [10.4269/ajtmh.1998.58.277](https://doi.org/10.4269/ajtmh.1998.58.277).
- 644 [26] Pan American Health Organization.(2019). *Technical document for the*  
645 *implementation of interventions based on generic operational scenarios for*  
646 *Aedes aegypti control*. Retrieved from  
647 [https://www.paho.org/en/documents/technical-document-implementation-](https://www.paho.org/en/documents/technical-document-implementation-interventions-based-generic-operational-scenarios-aedes)  
648 [interventions-based-generic-operational-scenarios-aedes](https://www.paho.org/en/documents/technical-document-implementation-interventions-based-generic-operational-scenarios-aedes).
- 649 [27] Di Rienzo, J. A., Casanoves, F., Balzarini, M. G., Gonzalez, L., Tablada, M., &  
650 Robledo, C. W. (2020). InfoStat version 2020. Centro de Transferencia InfoStat,  
651 FCA, Universidad Nacional de Córdoba, Argentina. Available from  
652 <http://www.infostat.com.ar>.
- 653 [28] World Health Organization. (2020). *Dengue and severe dengue*. Retrieved 3 May,  
654 2020, from [https://www.who.int/news-room/fact-sheets/detail/dengue-and-](https://www.who.int/news-room/fact-sheets/detail/dengue-and-severe-dengue)  
655 [severe-dengue](https://www.who.int/news-room/fact-sheets/detail/dengue-and-severe-dengue).
- 656 [29] Centros para el control y la prevención de enfermedades. (2022). *El dengue en el*  
657 *mundo*. Retrieved 18 January, 2022, from



## Dengue prevention community engagement

- 658 <https://www.cdc.gov/dengue/es/areaswithrisk/around-the-world.html>.
- 659 [30] Naing, C., Ren, W. Y., Man, C. Y., et al. (2011). Awareness of dengue and practice  
660 of dengue control among the semi-urban community: A cross sectional survey.  
661 *Journal of Community Health*, 36, 1044–1049. [https://doi.org/10.1007/s10900-](https://doi.org/10.1007/s10900-011-9407-1)  
662 [011-9407-1](https://doi.org/10.1007/s10900-011-9407-1).
- 663 [31] McNaughton, D., Clough, A., Johnson, P., Ritchie, S., & O’Neill, S. (2010).  
664 Beyond the ‘back yard’: Lay knowledge about *Aedes aegypti* in northern  
665 Australia and its implications for policy and practice. *Acta Tropica*, 116, 74–80.  
666 <https://doi.org/10.1016/j.actatropica.2010.05.012>.
- 667 [32] Quintero, J., Carrasquilla, G., Suárez, R., González, C., & Olano, V.A. (2009). An  
668 ecosystemic approach to evaluating ecological, socioeconomic and group  
669 dynamics affecting the prevalence of *Aedes aegypti* in two Colombian towns.  
670 *Cadernos de Saúde Pública*, 25, s93–s103. [https://doi.org/10.1590/S0102-](https://doi.org/10.1590/S0102-311X2009001300009)  
671 [311X2009001300009](https://doi.org/10.1590/S0102-311X2009001300009).
- 672 [33] Suárez, R., González, C., Carrasquilla, G., & Quintero, J. (2009). An ecosystem  
673 perspective in the socio-cultural evaluation of dengue in two Colombian towns.  
674 *Cadernos de Saúde Pública*, 25, S104–S114. [https://doi.org/10.1590/S0102-](https://doi.org/10.1590/S0102-311X2009001300010)  
675 [311X2009001300010](https://doi.org/10.1590/S0102-311X2009001300010).
- 676 [34] Wilder-Smith, A., & Gubler, D. J. (2008). Geographic expansion of dengue: The  
677 impact of international travel. *Medical Clinics of North America*, 92(6), 1377-  
678 1390. <https://doi.org/10.1016/j.mcna.2008.07.002>.
- 679 [35] Ministerio de Salud de Brazil. (2020). *Secretaria de Vigilância em Saúde. Boletim*  
680 *Epidemiológico* 24. Retrieved from  
681 [https://www.saude.gov.br/images/pdf/2020/June/16/Boletim-epidemiologico-](https://www.saude.gov.br/images/pdf/2020/June/16/Boletim-epidemiologico-SVS-24-final.pdf)  
682 [SVS-24-final.pdf](https://www.saude.gov.br/images/pdf/2020/June/16/Boletim-epidemiologico-SVS-24-final.pdf).
